# Supplementary material for: A new steady-state gas–particle partitioning model of polycyclic aromatic hydrocarbons: implication for the influence of the particulate proportion in emissions
Source: Copernicus journal article supplement (doi:10.5194/acp-23-8583-2023), 2023-08-02
Supplement: Supplementary file 1 [file acp-23-8583-2023-supplement.pdf]

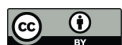

*Supplement of*

## **A new steady-state gas–particle partitioning model of polycyclic aromatic hydrocarbons: implication for the influence of the particulate proportion in emissions**

**Fu-Jie Zhu et al.**

*Correspondence to:* Wan-Li Ma ([mawanli002@163.com](mailto:mawanli002@163.com))

The copyright of individual parts of the supplement might differ from the article licence.

## Contents

### S1. Texts

|                                                                                                                            |    |
|----------------------------------------------------------------------------------------------------------------------------|----|
| Text S1. The introduction of the steady-state six-compartment six-fugacity model.....                                      | 3  |
| Text S2. The calculation method of the output and input fluxes for the particle phase and the gas phase compartments ..... | 7  |
| Text S3. The expression of the log $K_P$ using fugacity method .....                                                       | 8  |
| Text S4. The introduction of the prediction models.....                                                                    | 9  |
| Text S5. The calculation method of the root mean square error .....                                                        | 10 |

### S2. Tables

|                                                                                                                          |    |
|--------------------------------------------------------------------------------------------------------------------------|----|
| Table S1 The transport parameter $D$ (mol/(Pa·h)) for the multimedia fugacity model.....                                 | 11 |
| Table S2. The fugacity capacity $Z$ values and the partition parameter $K$ values for the multimedia fugacity model..... | 13 |
| Table S3. The partition parameter $K$ values for the multimedia fugacity model .....                                     | 14 |
| Table S4. The values of $A$ and $B$ for the PAHs .....                                                                   | 15 |
| Table S5. The half-lives of 15 PAHs in different phases ( $h^{-1}$ ).....                                                | 16 |
| Table S6. The environmental parameters for the multimedia fugacity model .....                                           | 17 |

### S3. Figures

|                                                                                                                                                                                                                                                                                       |    |
|---------------------------------------------------------------------------------------------------------------------------------------------------------------------------------------------------------------------------------------------------------------------------------------|----|
| Fig. S1. Comparison of the fluxes for the input and output fluxes of the gas phase and particle phase .....                                                                                                                                                                           | 19 |
| Fig. S2. The difference between the new steady-state model with the H-B model and the L-M-Y model .....                                                                                                                                                                               | 20 |
| Fig. S3. The comparison between the monitored data of log $K_{P-M}$ of PAHs from 11 cities in China and the prediction lines of the new steady-state model with different values of $\phi_0$ .....                                                                                    | 21 |
| Fig. S4. The values of RMSE for the new steady-state model based on the monitored data from 11 cities in China .....                                                                                                                                                                  | 22 |
| Fig. S5. The comparison between the monitored data of log $K_{P-M}$ of PAHs from a coking plant and the prediction lines of the new steady-state model with different values of $\phi_0$ (left panel) and the related values of RMSE of the new steady-state model (right panel)..... | 23 |
| Fig. S6. The comparison between the monitored data of log $K_{P-M}$ of PBDEs from E-waste sites and the prediction lines of the new steady-state model with different values of $\phi_0$ ..                                                                                           | 24 |
| Fig. S7. The values of the RMSE of the new steady-state model based on the monitored data of PBDEs from e-waste sites .....                                                                                                                                                           | 25 |
| Fig. S8. Sensitivity analysis for the parameters of $\phi_0$ , $f_{OM}$ , and $k_{deg}$ in the new steady-state model .....                                                                                                                                                           | 26 |

|                         |           |
|-------------------------|-----------|
| <b>References .....</b> | <b>27</b> |
|-------------------------|-----------|

## S1. Texts

### Text S1. The introduction of the steady-state six-compartment six-fugacity model

Multimedia fugacity models have been used to address chemical pollution by providing a quantitative account of the sources, transport processes, fate and sinks of organic chemicals (Mackay, 2001). A steady-state six-compartment (gas, particle, liquid, suspended particle matter (SPMs), soil, sediments) six-fugacity model was derived using the fugacity theory (Li et al., 2021b). The six-compartment six-fugacity system was exhibited in following figure. The subscripts represent different environment matrix: gas (G), liquid (L), soil (S), sediment (Sed), particle in air (P), and particle in liquid (O). The primary equation in fugacity models is the relationship between the flux ( $F$ ) and the fugacity ( $f$ ):

$$F = fD \quad (S1)$$

where  $D$  is the intermedia  $D$  values defined in the fugacity theory (Mackay, 2001).

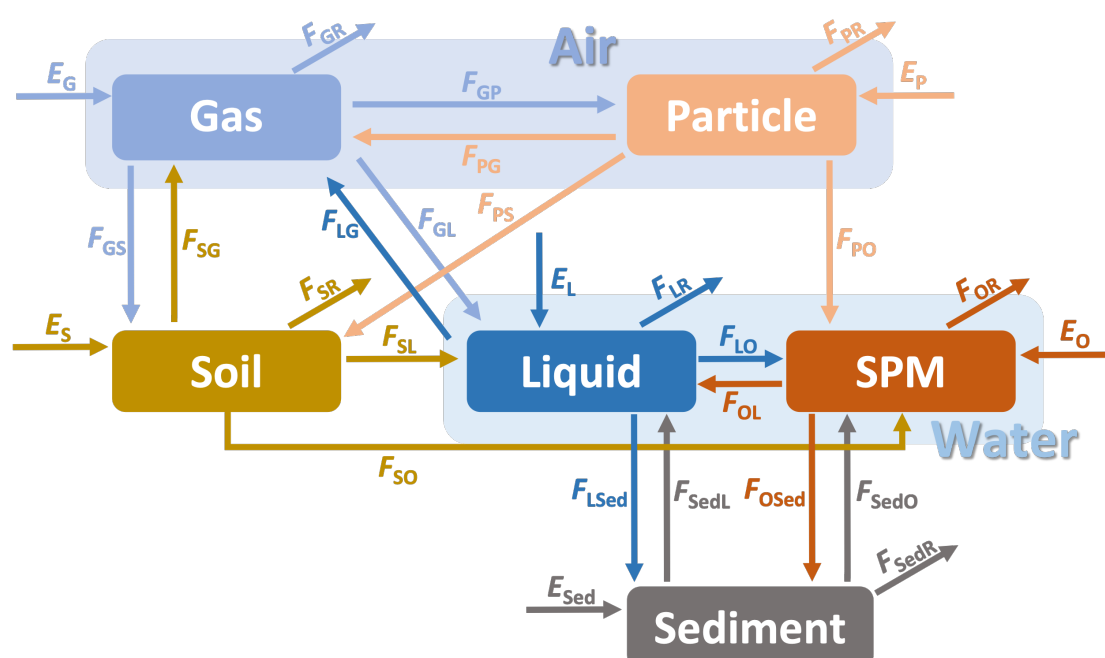

The six-compartment six-fugacity system

(Notes:  $E_i$  is the emission rate (mol/h) to compartment  $i$ ;  $F_{ij}$  is the flux from compartment  $i$  to compartment  $j$  (mol/h);  $F_{iR}$  is the flux by reaction (mol/h); Particle represents particle in air; SPM represents suspended particle matter in water.)

The relationships between the above figure (focusing on the processes related to the six compartments) in Supporting Information and Fig.1 (focusing on the processes related to gas and particle phases) in the main text of the manuscript were described in detail as follows. For the gas phase, in the above figure, the flux of  $F_{GS}$  (flux from gas to soil) includes the diffusion flux from gas to soil ( $F_{GS\_diff}$ ) and the wet deposition flux from gas to soil ( $F_{GS\_w}$ ). The flux of  $F_{GL}$  (flux from gas to liquid) includes the diffusion flux from gas to soil ( $F_{GW\_diff}$ ) and the wet deposition flux from gas to liquid ( $F_{GW\_w}$ ). In the Fig. 1, the corresponding flux  $F_{GSW\_diff}$  is the sum of  $F_{GS\_diff}$  and  $F_{GW\_diff}$ .  $F_{GW}$  is the sum of  $F_{GS\_w}$  and  $F_{GW\_w}$ . For the particle phase, in the above figure, the flux of  $F_{PO}$  (flux from particle to SPMs) includes wet deposition flux from particle to SPMs ( $F_{PO\_w}$ ) and dry deposition flux from particle to SPMs ( $F_{PO\_D}$ ). The flux of  $F_{PS}$  (flux from particle to soil) includes wet deposition flux from particle to soil ( $F_{PS\_w}$ ) and dry deposition flux from particle to soil ( $F_{PS\_D}$ ). In the Fig. 1, the corresponding flux  $F_{PD}$  is the sum of  $F_{PO\_D}$  and  $F_{PS\_D}$ . The flux  $F_{PW}$  is the sum of  $F_{PO\_w}$  and  $F_{PS\_w}$ .

Once the relationships between the six compartments were confirmed, the function between the total input flux and the total output flux can be established for each compartment. The relationship follows the general form:

$$E_i + \sum D_{ji}f_j = \sum D_{ik}f_i + D_{iR}f_i \quad (S2)$$

where,  $E_i$  is the emission rate (mol/h) to compartment i;  $D_{ji}$  is the intermedia  $D$  values from compartment j to compartment i (mol/(Pa·h));  $D_{ik}$  is the intermedia  $D$  values from compartment i to compartment k (mol/(Pa·h));  $D_{iR}$  is the reaction rate  $D$  value in compartment i (mol/(Pa·h));  $f_i$  and  $f_j$  are the fugacity of chemical in compartment i and compartment j (Pa).

In the present study, both the gaseous and particulate emissions were considered in the models. Therefore, the above equation for each compartment can be expressed as follows in detail:

Air: Gas phase:

$$E_G + D_{LG}f_L + D_{SG}f_S + D_{PG}f_P = (D_{GL} + D_{GS} + D_{GP} + D_{GR})f_G \quad (S3)$$

Air: Particle phase:

$$E_P + D_{GP}f_G = (D_{PG} + D_{PS} + D_{PO} + D_{PR})f_P \quad (S4)$$

Water: Dissolved phase:

$$D_{GL}f_G + D_{SL}f_S + D_{SedL}f_{Sed} + D_{OL}f_O = (D_{LG} + D_{LSed} + D_{LO} + D_{LR})f_L \quad (S5)$$

Water: Solid phase:

$$D_{LO}f_L + D_{SO}f_S + D_{SedO}f_{Sed} + D_{PO}f_P = (D_{OL} + D_{OSed} + D_{OR})f_O \quad (S6)$$

Soil phase:

$$D_{GS}f_G + D_{PS}f_P = (D_{SG} + D_{SL} + D_{SO} + D_{SR})f_S \quad (S7)$$

Sediment phase:

$$D_{LSed}f_S + D_{OSed}f_O = (D_{SedL} + D_{SedO} + D_{SedR})f_{Sed} \quad (S8)$$

where  $D$  values for each intermedia process were given in **Table S1**.

The fugacity capacity  $Z$  values of each compartment used for calculation of the  $D$  values can be obtained by the equations in **Table S2**. The parameters for PAHs and environment were given in **Tables S3, S4 S5 and S6**. In the present study, the unit of the system was assumed as a cuboid with the air surface area ( $A_A$ ) of 1 m<sup>2</sup>, water surface area ( $A_W$ ) of 0.7 m<sup>2</sup>, and soil surface area ( $A_S$ ) of 0.3 m<sup>2</sup>. The height and/or depth of air, water and soil are 1000, 10 and 0.15 m, respectively.

The fugacity for each compartment can be obtained by analyzing the above equations. Then the parameters of each compartment and the parameters between

different compartments can be calculated, such as fluxes, concentrations, mass fractions, and partitioning behavior (Qin et al., 2021; Li et al., 2021b; Li et al., 2021a).

**Text S2. The calculation method of the output and input fluxes for the particle phase and the gas phase compartments**

The 11 output and input fluxes for the particle phase and the gas phase can be calculated by the following equations:

$$(1 - \phi_0)E = E_G \quad (\text{S9})$$

$$\phi_0 E = E_P \quad (\text{S10})$$

$$F_{GP} = D_{GP} f_G \quad (\text{S11})$$

$$F_{PG} = D_{GP} f_P \quad (\text{S12})$$

$$F_{G\text{diff}} = (D_{GDL} + D_{GDS}) f_G \quad (\text{S13})$$

$$F_{GW} = (D_{GWL} + D_{GWS}) f_G \quad (\text{S14})$$

$$F_{\text{diff}G} = D_{LG} f_L + D_{SG} f_S \quad (\text{S15})$$

$$F_{PD} = (D_{PDO} + D_{PDS}) f_P = D_{PD} f_P \quad (\text{S16})$$

$$F_{PW} = (D_{PWO} + D_{PWS}) f_P = D_{PW} f_P \quad (\text{S17})$$

$$F_{GR} = D_{GR} f_G \quad (\text{S18})$$

$$F_{PR} = D_{PR} f_P \quad (\text{S19})$$

where the  $D$  values can be found in **Table S1**.

### Text S3. The expression of the log $K_P$ using fugacity method

The G–P partitioning coefficient ( $K_P$ ) can be calculated as follows:

$$K_P = (C_P/C_G)/TSP \quad (S20)$$

where  $C_P$  (ng/m<sup>3</sup> air) and  $C_G$  (ng/m<sup>3</sup>) are the PAHs concentrations in particle phase and gas phase, respectively, and  $TSP$  is the concentrations of total suspended particles (μg/m<sup>3</sup>).

$C_P$  can be transferred to  $C'_P$  (ng/m<sup>3</sup> particle) based the following equation:

$$C_P = C'_P \times TSP/10^9 \rho_P \quad (S21)$$

where  $C'_P$  (ng/m<sup>3</sup> particle) is the PAHs concentrations in particle phase with different units, and  $\rho_P$  is the density of particles (kg/m<sup>3</sup>).

Then, the Eq. (S20) can be expressed in different form:

$$K_P = (C'_P/C_G)/10^9 \rho_P \quad (S22)$$

The ratio of  $C'_P$  to  $C_G$  can be calculated using the method from the multimedia fugacity model:

$$C'_P/C_G = f_P Z_P / f_G Z_G \quad (S23)$$

where  $Z_P/Z_G$  equal to  $K_{PG}$  at equilibrium state, which can be calculated by the following equation (Li et al., 2015):

$$K_{PG} = Z_P/Z_G = 10^9 \rho_P K_{P-HB} \quad (S24)$$

where  $K_{P-HB}$  is the G–P partitioning coefficient calculated from the H-B model (the equilibrium-state model) (Harner and Bidleman, 1998b).

Summarizing the equations above, log  $K_P$  can be expressed as following equation:

$$\log K_P = \log K_{P-HB} + \log(f_P/f_G) \quad (S25)$$



## Text S4. The introduction of the prediction models

### The H-B model

Under assumptions that the dominate G–P distribution process was absorption and the system was in *equilibrium-state*, an equation (named as the *H-B* model in the present study) used to predict the value of  $K_P$  for SVOCs was derived in an early study (Harner and Bidleman 1998b)

$$\log K_{P-HB} = \log K_{OA} + \log f_{OM} - 11.91 \quad (S26)$$

### The L-M-Y model

Li et al. established a *steady-state* model (named as the *L-M-Y* model in the present study) for the investigation of the G–P partitioning behavior of PBDEs (Li et al. 2015). The influences of dry and wet depositions of particles on the G–P partitioning were considered in the *L-M-Y* model. A non-equilibrium parameter caused by dry and wet depositions of particles,  $\log \alpha$  was introduced into the *L-M-Y* model:

$$\log K_{P-LMY} = \log K_{P-HB} + \log \alpha \quad (S27)$$

$$\log \alpha = -\log(1 + 4.18 \times 10^{-11} f_{OM} K_{OA}) \quad (S28)$$

Therefore, the *H-B* model is a special case of the *L-M-Y* model when the non-equilibrium term ( $\log \alpha$ ) equal zero.

### **Text S5. The calculation method of the root mean square error**

To evaluate the performance of the new steady-state model, the root mean square error (RMSE) was calculated based on the following equation:

$$RMSE = \sqrt{\frac{1}{n} \sum (\log K_{P-P} - \log K_P)^2} \quad (S29)$$

where  $\log K_{P-P}$  is the prediction data from the new steady-state model, and  $\log K_P$  is the monitored data.

The smaller of the RMSE value indicated the better matching degree between the predicted data and the monitored data.

## S2. Tables

**Table S1 The transport parameter  $D$  (mol/(Pa·h)) for the multimedia fugacity model**

| Compartments   | Symbol    | $D$ values                                                   | Process                     |
|----------------|-----------|--------------------------------------------------------------|-----------------------------|
| Gas-Liquid     | $D_{GDL}$ | $1/[1/(k_{VG}A_{12}Z_G)+1/(k_{VW}A_{12}Z_W)]$                | Diffusion                   |
|                | $D_{GWL}$ | $A_{12}U_RZ_W$                                               | Rain dissolution            |
|                | $D_{GL}$  | $D_{GDL}+D_{GWL}$                                            | Gas $\rightarrow$ Liquid    |
|                | $D_{LG}$  | $D_{GDL}$                                                    | Liquid $\rightarrow$ Gas    |
| Gas-Soil       | $D_{GDS}$ | $1/[1/(k_{EG}A_{13}Z_G)+Y_3/[A_{13}(B_{MG}Z_G+B_{MW}Z_W)]]]$ | Diffusion                   |
|                | $D_{GWS}$ | $A_{13}U_RZ_W$                                               | Rain dissolution            |
|                | $D_{GS}$  | $D_{GDS}+D_{GWS}$                                            | Gas $\rightarrow$ Soil      |
|                | $D_{SG}$  | $D_{GDS}$                                                    | Soil $\rightarrow$ Gas      |
| Particles-SPMs | $D_{PWO}$ | $A_{12}U_RQ_{VP}Z_P$                                         | Wet deposition              |
|                | $D_{PDO}$ | $A_{12}U_{DV}Z_P$                                            | Dry deposition              |
|                | $D_{PO}$  | $D_{PWO}+D_{PDO}$                                            | Particle $\rightarrow$ SPMs |
|                | $D_{PWS}$ | $A_{13}U_RQ_{VP}Z_P$                                         | Wet deposition              |
| Particles-Soil | $D_{PDS}$ | $A_{13}U_{DV}Z_P$                                            | Dry deposition              |
|                | $D_{PS}$  | $D_{PWS}+D_{PDS}$                                            | Particle $\rightarrow$ Soil |
|                | $D_{PG}$  | $A_Pk_{PG}Z_G$                                               | Sorption and desorption     |
| Gas-Particles  | $D_{GP}$  | $D_{PG}$                                                     | Gas $\rightarrow$ Particle  |
|                | $D_{PG}$  | $D_{PG}$                                                     | Particle $\rightarrow$ Gas  |
| Soil-Liquid    | $D_{SL}$  | $A_{13}U_{WW}Z_W$                                            | Water runoff                |
|                | $D_{SL}$  | $D_{SL}$                                                     | Soil $\rightarrow$ Liquid   |
| Soil-SPMs      | $D_{SO}$  | $A_{13}U_{EW}Z_S$                                            | Soil runoff                 |
|                | $D_{SO}$  | $D_{SO}$                                                     | Soil $\rightarrow$ SPM      |
| Liquid-SPMs    | $D_{LO}$  | $A_{OK}k_{WO}Z_W$                                            | Sorption and desorption     |

*continued Table S1*

| Compartments    | Symbol     | $D$ values                                     | Process                        |
|-----------------|------------|------------------------------------------------|--------------------------------|
|                 | $D_{LO}$   | $D_{LO}$                                       | Liquid $\rightarrow$ SPMs      |
|                 | $D_{OL}$   | $D_{LO}$                                       | SPMs $\rightarrow$ Liquid      |
| Sediment-Liquid | $D_{SedL}$ | $1/[1/(k_{SW}A_{24}Z_W)+Y_4/(B_M wA_{24}Z_W)]$ | diffusion                      |
|                 | $D_{SedL}$ | $D_{SedL}$                                     | Liquid $\rightarrow$ Sediment  |
|                 | $D_{LSed}$ | $D_{SedL}$                                     | Sediment $\rightarrow$ Liquid  |
|                 | $D_{OSed}$ | $U_{DO}A_{24}Z_O$                              | Deposition                     |
| Sediment-SPMs   | $D_{SedO}$ | $U_{RS}A_{24}Z_{Sed}$                          | Resuspension                   |
|                 | $D_{OSed}$ | $D_{OSed}$                                     | SPMs $\rightarrow$ Sediment    |
|                 | $D_{SedO}$ | $D_{SedO}$                                     | Sediment $\rightarrow$ SPMs    |
| Degradation     | $D_{iR}$   | $k_{degi}V_iZ_i$                               | Degradation in compartment $i$ |

Notes: The gaseous degradation rate of PAHs can be calculated using the half-lives of PAHs:  $k_{degi} = \ln(2)/t_{1/2}$  (The half-lives of the 15 PAHs can be found in **Table S5**).

**Table S2. The fugacity capacity  $Z$  values and the partition parameter  $K$  values for the multimedia fugacity model**

| $Z$       | Equation              | Unit                     |
|-----------|-----------------------|--------------------------|
| $Z_G$     | $1/RT$                | mol/(m <sup>3</sup> ·Pa) |
| $Z_W$     | $1/H$ or $Z_G/K_{AW}$ | mol/(m <sup>3</sup> ·Pa) |
| $Z_S$     | $K_{SG}Z_G$           | mol/(m <sup>3</sup> ·Pa) |
| $Z_{sed}$ | $K_{SedW}Z_W$         | mol/(m <sup>3</sup> ·Pa) |
| $Z_P$     | $K_{PG}Z_G$           | mol/(m <sup>3</sup> ·Pa) |
| $Z_O$     | $K_{PW}Z_W$           | mol/(m <sup>3</sup> ·Pa) |

**Table S3. The partition parameter  $K$  values for the multimedia fugacity model**

| $K$ Process          | $K$        | Equation                              | Unit          |
|----------------------|------------|---------------------------------------|---------------|
| Soil-Gas             | $K_{SG}$   | $f_{OM(S)}K_{OA}$                     | dimensionless |
| Sediment-Liquid      | $K_{SedW}$ | $f_{OC(Sed)}K_{OC}\rho_{Sed}/1000$    | dimensionless |
| Gas-Particle         | $K_{PG}$   | $10^{-2.91}\rho_P f_{OM}K_{OA}$       | dimensionless |
| SPMs-Liquid          | $K_{PW}$   | $f_{OC(O)}\rho_O K_{OC}/1000$         | dimensionless |
| Organic carbon-Water | $K_{OC}$   | $0.41(L/kg)K_{OW}$                    | L/kg          |
| Air-Water            | $K_{AW}$   | $\log K_{AW} = A_{AW} + B_{AW} / T_W$ | dimensionless |
| Octanol-Water        | $K_{OW}$   | $\log K_{OW} = A_{OW} + B_{OW} / T_W$ | dimensionless |
| Octanol-Air          | $K_{OA}$   | $\log K_{OA} = A_{OA} + B_{OA} / T$   | dimensionless |

Note:  $T$  and  $T_W$  are the temperature in atmosphere and in water, respectively, K; The values of  $T$  equal to  $T_W$  when the temperature in air higher than 0°C, and the value of  $T_W$  equal to the constant value when the temperature in air lower than 0°C; The values of A and B for the calculation of  $K_{AW}$ ,  $K_{OW}$ ,  $K_{OA}$  can be calculated (See details in **Table S4**).

**Table S4. The values of *A* and *B* for the PAHs**

| PAHs                   | Abbreviations | $A_{AW}$ | $B_{AW}$ | $A_{OW}$ | $B_{OW}$ | $A_{OA}$ | $B_{OA}$ |
|------------------------|---------------|----------|----------|----------|----------|----------|----------|
| acenaphthylene         | Acy           | 5.46     | -2272    | 1.67     | 593      | -1.97    | 2476     |
| acenaphthene           | Ace           | 5.66     | -2251    | 1.43     | 774      | -2.20    | 2597     |
| fluorene               | Flu           | 5.97     | -2483    | 1.56     | 816      | -2.61    | 2833     |
| phenanthrene           | Phe           | 6.06     | -2607    | 1.49     | 944      | -3.37    | 3293     |
| anthracene             | Ant           | 6.14     | -2620    | 1.73     | 867      | -3.41    | 3316     |
| fluoranthene           | Fluo          | 6.44     | -2850    | 0.83     | 1295     | -4.34    | 3904     |
| pyrene                 | Pyr           | 6.29     | -2780    | 1.09     | 1182     | -4.56    | 3985     |
| benzo[a]anthracene     | BaA           | 7.10     | -3222    | 0.99     | 1453     | -5.64    | 4746     |
| chrysene               | Chr           | 7.01     | -3205    | 0.91     | 1499     | -5.65    | 4754     |
| benzo[b]fluoranthene   | BbF           | 7.39     | -3438    | -0.33    | 1847     | -6.40    | 5285     |
| benzo[k]fluoranthene   | BkF           | 7.47     | -3458    | 0.10     | 1870     | -6.42    | 5301     |
| benzo[a]pyrene         | BaP           | 7.25     | -3374    | 0.32     | 1709     | -6.50    | 5382     |
| indeo[1,2,3-cd]pyrene  | IcdP          | 7.63     | -3614    | -0.73    | 2177     | -7.00    | 5791     |
| dibenzo[a,h]anthracene | DahA          | 7.97     | -3805    | 0.52     | 1986     | -7.17    | 5887     |
| benzo[g,h,j]perylene   | BghiP         | 7.41     | -3526    | -0.67    | 2245     | -7.03    | 5834     |

Note: The values of  $A_{OA}$  and  $B_{OA}$  were cited from references (Odabasi et al., 2006; Harner and Bidleman, 1998a), except the values for Nap were calculated by the equations:  $B_X = U_X / (\ln(10) * 8.314)$ ,  $A_X = \log K_X(25^\circ\text{C}) - B_X / 298.15$  (X represent AW, OW, and OA).  $A_{OW}$  and  $B_{OW}$  were also calculated using the above equations. The values in the equations ( $\log K_X$ ,  $U_X$ ) were calculated using the UFZ - LSER Database ([https://www.ufz.de/index.php?en=31698&contentonly=1&m=0&lserd\\_data\[mvc\]=Public/start](https://www.ufz.de/index.php?en=31698&contentonly=1&m=0&lserd_data[mvc]=Public/start)).  $A_{AW}$  and  $B_{AW}$  were calculated by the equations:  $A_{AW} = A_H - 3.351$ ,  $B_{AW} = B_H$  ( $A_H$  and  $B_H$  were parameters used for the calculation of the Henry's Law constants (Parnis et al., 2016),  $\log K_{AW} = \log H - \log(R*T)$ ,  $\log(R*T) \approx 3.351$  when temperature ranged from 223 K to 323 K).  $\log K_{OW}$  (25°C) for BbF and IcdP were cited from the reference (Ma et al., 2010).  $U_{OW}$  for BbF and IcdP were calculated from  $U_{OW} = U_{OA} + U_{AW}$ .

**Table S5. The half-lives of 15 PAHs in different phases (h<sup>-1</sup>)**

| PAHs  | $t_A$ | $t_W$ | $t_S$              | $t_{Sed}$          | $t_P$              | $t_O$              |
|-------|-------|-------|--------------------|--------------------|--------------------|--------------------|
| Acy   | 1.70  | 360   | $7.20 \times 10^2$ | $3.24 \times 10^3$ | $7.20 \times 10^2$ | $3.24 \times 10^3$ |
| Ace   | 1.92  | 900   | $1.80 \times 10^3$ | $8.10 \times 10^3$ | $1.80 \times 10^3$ | $8.10 \times 10^3$ |
| Flu   | 14.5  | 360   | $7.20 \times 10^2$ | $3.24 \times 10^3$ | $7.20 \times 10^2$ | $3.24 \times 10^3$ |
| Phe   | 9.87  | 1440  | $2.88 \times 10^3$ | $1.30 \times 10^4$ | $2.88 \times 10^3$ | $1.30 \times 10^4$ |
| Ant   | 3.21  | 1440  | $2.88 \times 10^3$ | $1.30 \times 10^4$ | $2.88 \times 10^3$ | $1.30 \times 10^4$ |
| Fluo  | 4.39  | 1440  | $2.88 \times 10^3$ | $1.30 \times 10^4$ | $2.88 \times 10^3$ | $1.30 \times 10^4$ |
| Pyr   | 2.57  | 1440  | $2.88 \times 10^3$ | $1.30 \times 10^4$ | $2.88 \times 10^3$ | $1.30 \times 10^4$ |
| BaA   | 2.57  | 1440  | $2.88 \times 10^3$ | $1.30 \times 10^4$ | $2.88 \times 10^3$ | $1.30 \times 10^4$ |
| Chr   | 2.57  | 1440  | $2.88 \times 10^3$ | $1.30 \times 10^4$ | $2.88 \times 10^3$ | $1.30 \times 10^4$ |
| BbF   | 6.92  | 1440  | $2.88 \times 10^3$ | $1.30 \times 10^4$ | $2.88 \times 10^3$ | $1.30 \times 10^4$ |
| BkF   | 2.39  | 1440  | $2.88 \times 10^3$ | $1.30 \times 10^4$ | $2.88 \times 10^3$ | $1.30 \times 10^4$ |
| BaP   | 2.57  | 1440  | $2.88 \times 10^3$ | $1.30 \times 10^4$ | $2.88 \times 10^3$ | $1.30 \times 10^4$ |
| IcdP  | 1.99  | 1440  | $2.88 \times 10^3$ | $1.30 \times 10^4$ | $2.88 \times 10^3$ | $1.30 \times 10^4$ |
| DahA  | 2.57  | 1440  | $2.88 \times 10^3$ | $1.30 \times 10^4$ | $2.88 \times 10^3$ | $1.30 \times 10^4$ |
| BghiP | 1.48  | 1440  | $2.88 \times 10^3$ | $1.30 \times 10^4$ | $2.88 \times 10^3$ | $1.30 \times 10^4$ |

Note: The data were cited from the Estimation Programs Interface (EPI) Suite <sup>TM</sup> (the US Environmental Protection Agency's Office of Pollution Prevention and Toxics and Syracuse Research Corporation (SRC)).



**Table S6. The environmental parameters for the multimedia fugacity model**

| Parameters                     | Description                                        | Value                  | Unit              | Function               |
|--------------------------------|----------------------------------------------------|------------------------|-------------------|------------------------|
| $k_{VG}$                       | Gas side MTC over water                            | 3                      | m/h               |                        |
| $k_{VW}$                       | Liquid side MTC                                    | 0.03                   | m/h               |                        |
| $U_R$                          | Rainfall rate                                      | $9.70 \times 10^{-5}$  | m/h               |                        |
| $Q$                            | Scavenging ratio                                   | $2 \times 10^5$        | -                 |                        |
| $v_P$                          | Volume fraction of aerosol particle                | $6.67 \times 10^{-11}$ | -                 | $10^{-9} TSP / \rho_P$ |
| $U_D$                          | Dry deposition velocity                            | 10.8                   | m/h               |                        |
| $k_{EG}$                       | Gas side MTC over soil                             | 1                      | m/h               |                        |
| $Y_3$                          | Diffusion path length in soil                      | 0.05                   | m                 |                        |
| $B_{MG}$                       | Molecular diffusivity in gas                       | 0.04                   | m <sup>2</sup> /h |                        |
| $B_{MW}$                       | Molecular diffusivity in liquid                    | $4.00 \times 10^{-6}$  | m <sup>2</sup> /h |                        |
| $U_{WW}$                       | Liquid runoff rate from soil                       | $3.90 \times 10^{-5}$  | m/h               |                        |
| $U_{EW}$                       | Solids runoff rate from soil                       | $2.30 \times 10^{-8}$  | m/h               |                        |
| $k_{SW}$                       | Liquid side MTC over sediment                      | 0.01                   | m/h               |                        |
| $Y_4$                          | Diffusion path length in sediment                  | 0.005                  | m                 |                        |
| $U_{DO}$                       | SPMs deposition rate                               | $4.60 \times 10^{-8}$  | m/h               |                        |
| $U_{RS}$                       | Sediment resuspension rate                         | $1.10 \times 10^{-8}$  | m/h               |                        |
| $k_{PG}$                       | Gas-Particle Partitioning MTC                      | $1.89 \times 10^1$     | m/h               | $C B_{PG} / l_{PG}$    |
| $B_{PG}$                       | Molecular diffusivity in air                       | $1.80 \times 10^{-2}$  | m <sup>2</sup> /h |                        |
| $l_{PG}$                       | Air boundary layer thickness                       | $4.75 \times 10^{-3}$  | m                 |                        |
| $C$                            | Accommodation coefficient                          | 5                      | -                 |                        |
| $k_{WO}$                       | Solid-Dissolved Partitioning MTC                   | $4.21 \times 10^{-3}$  | m/h               | $C B_{WO} / l_{WO}$    |
| $B_{WO}$                       | Molecular diffusivity in water                     | $4.00 \times 10^{-6}$  | m <sup>2</sup> /h |                        |
| $l_{WO}$                       | Water boundary layer thickness                     | $4.75 \times 10^{-3}$  | m                 |                        |
| $C'$                           | Accommodation coefficient                          | 5                      | -                 |                        |
| $\rho_P / \rho_O / \rho_{Sed}$ | Density of particles in air and water and sediment | $1.50 \times 10^3$     | kg/m <sup>3</sup> |                        |
| $d_P / d_O$                    | Diameter of particles in air and water             | $1.00 \times 10^{-7}$  | m                 |                        |
| $TSP$                          | Concentration of particles in air                  | $1.00 \times 10^2$     | ug/m <sup>3</sup> |                        |
| $SPM$                          | Concentration of particles in water                | 10                     | g/m <sup>3</sup>  |                        |

*continued Table S6*

| Parameters    | Description                            | Value | Unit           | Function                                         |
|---------------|----------------------------------------|-------|----------------|--------------------------------------------------|
| $f_{OC(O)}$   | Fraction of organic carbon in SPMs     | 0.04  | –              |                                                  |
| $f_{OM(S)}$   | Fraction of organic materials in soil  | 0.04  | –              |                                                  |
| $f_{OC(Sed)}$ | Fraction of organic carbon in sediment | 0.1   | –              |                                                  |
| $A_P$         | Total area of particles in air         | 4     | m <sup>2</sup> | $6 \times 10^{-9} TSP \times V_G / (\rho_P d_P)$ |
| $A_O$         | Total area of particles in Water       | 2800  | m <sup>2</sup> | $6 \times 10^{-3} SPM \times V_W / (\rho_O d_O)$ |

Note: The values of the parameters were cited from Mackay (2001) (Mackay, 2001).

### S3. Figures

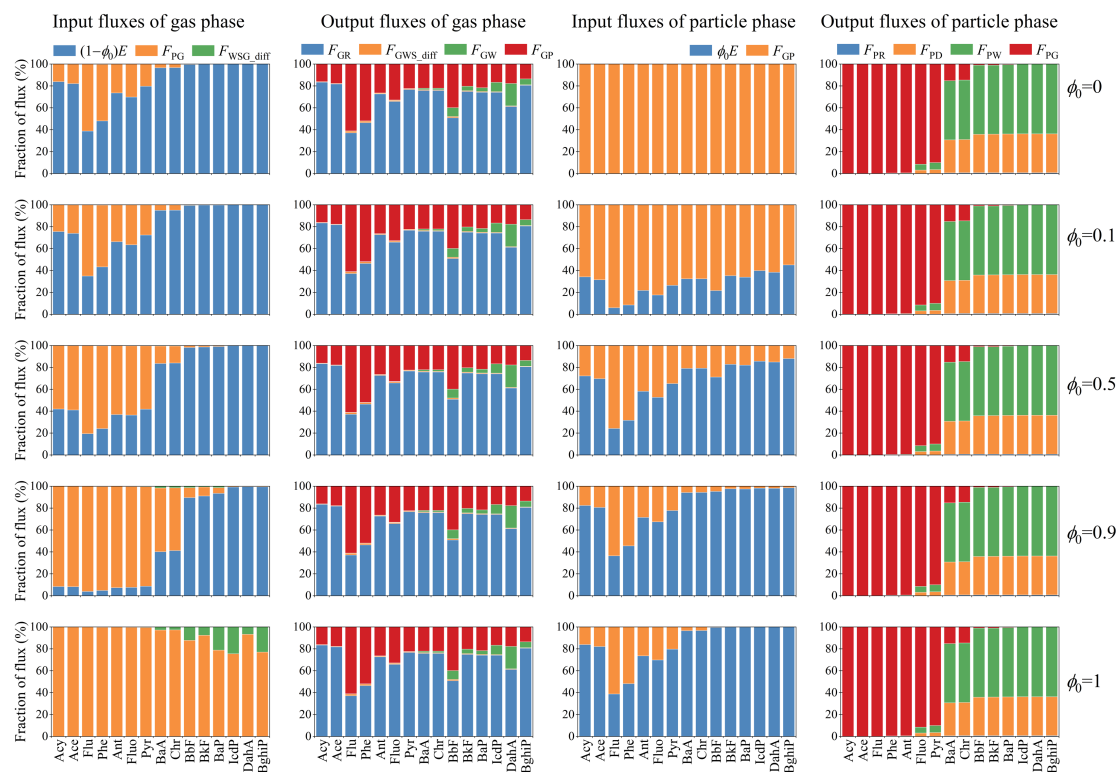

**Fig. S1. Comparison of the fluxes for the input and output fluxes of the gas phase and particle phase**

Note:  $F_{GR}$ : degradation flux of gas phase PAHs;  $F_{PR}$ : degradation flux of particle phase PAHs;  $F_{GP}$ : migration flux from gas phase to particle phase;  $F_{PG}$ : migration flux from particle phase to gas phase;  $F_{GWS\_diff}$ : diffusion fluxes from gas phase to water and soil phases;  $F_{GW}$ : wet deposition flux of gas phase PAHs;  $F_{WSG\_diff}$ : diffusion fluxes from soil and water phases to gas phase;  $F_{PD}$ : dry deposition flux of particle phase PAHs;  $F_{PW}$ : wet deposition flux of particle phase PAHs;  $(1-\phi_0)E$ : emission flux of gas phase PAHs;  $\phi_0E$ : emission flux of particle phase PAHs.

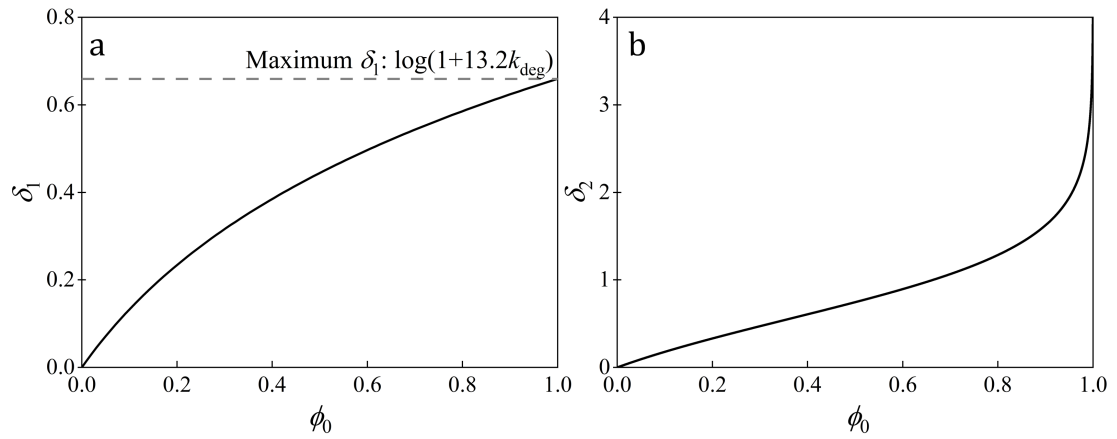

**Fig. S2. The difference between the new steady-state model with the H-B model and the L-M-Y model**

Note:  $\delta_1$  and  $\delta_2$  were calculated based on the value of  $k_{\text{deg}} = 0.27 \text{ h}^{-1}$ ,  $\delta_1$  is the difference between the new steady-state model with the H-B model and the L-M-Y model when  $\log K_{\text{OA}} < \log K_{\text{OA}1}$ , and  $\delta_2$  is the difference between the new steady-state model with the L-M-Y model when  $\log K_{\text{OA}} > \log K_{\text{OA}2}$ .

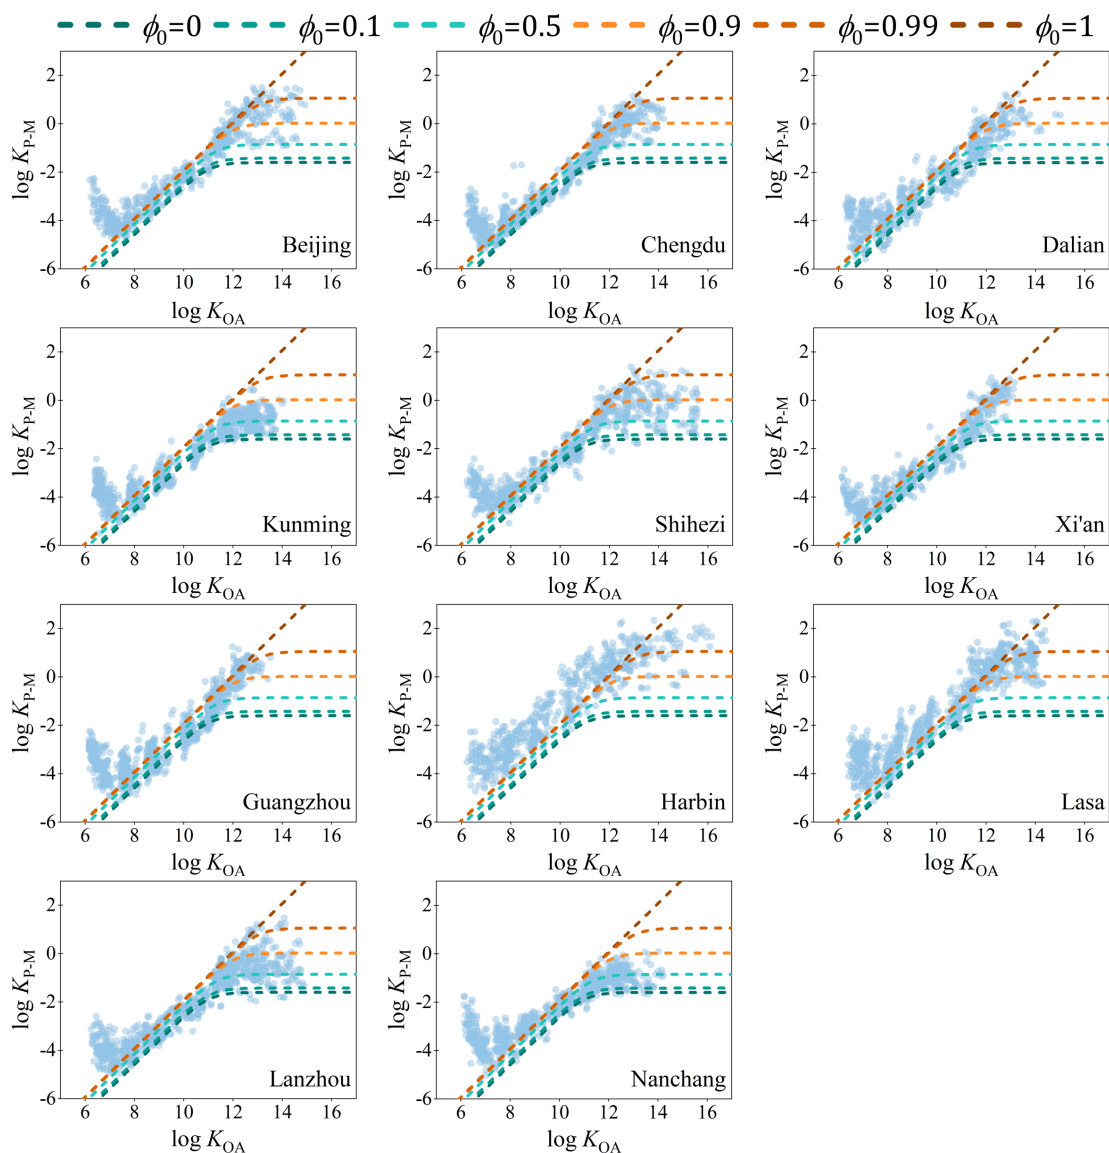

**Fig. S3.** The comparison between the monitored data of  $\log K_{P-M}$  of PAHs from 11 cities in China and the prediction lines of the new steady-state model with different values of  $\phi_0$ .

Note: the  $k_{deg}$  of  $0.27 \text{ h}^{-1}$  and  $f_{OM}$  of 0.21 were used in the new steady-state model.

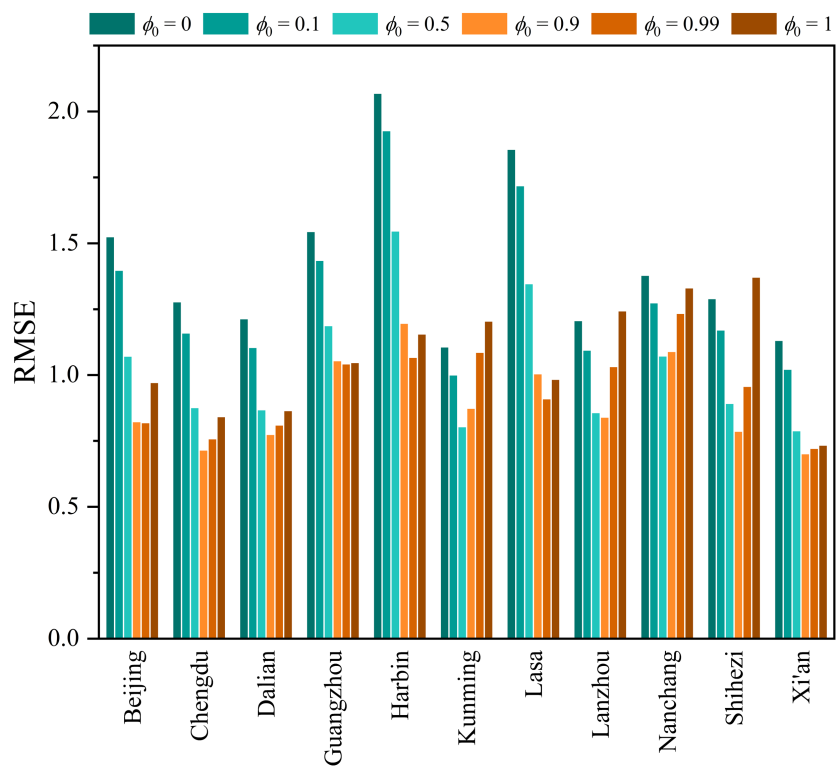

**Fig. S4. The values of RMSE for the new steady-state model based on the monitored data from 11 cities in China**

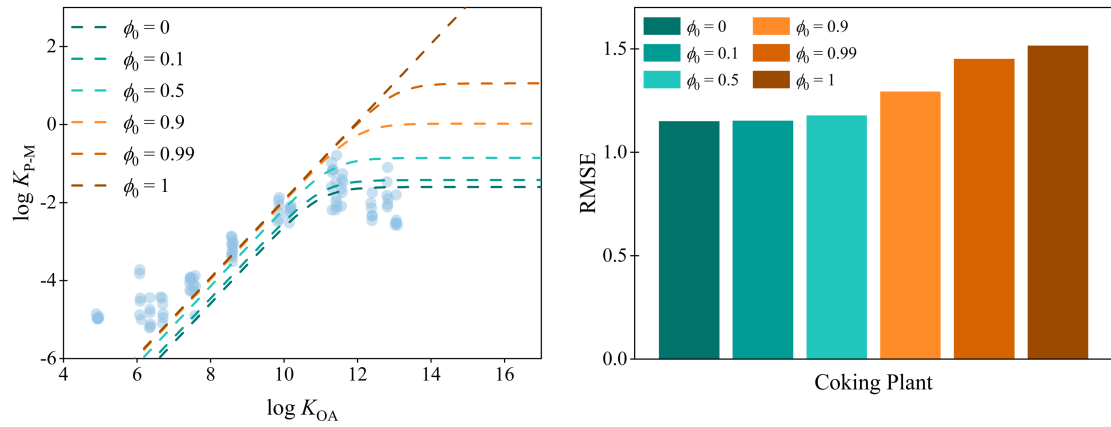

**Fig. S5. The comparison between the monitored data of  $\log K_{P-M}$  of PAHs from a coking plant and the prediction lines of the new steady-state model with different values of  $\phi_0$  (left panel) and the related values of RMSE of the new steady-state model (right panel)**

Note: The  $k_{deg}$  of  $0.27 \text{ h}^{-1}$  and  $f_{OM}$  of 0.21 were used in the new steady-state model; and the monitored data were cited from a coking plant (Liu et al., 2019).

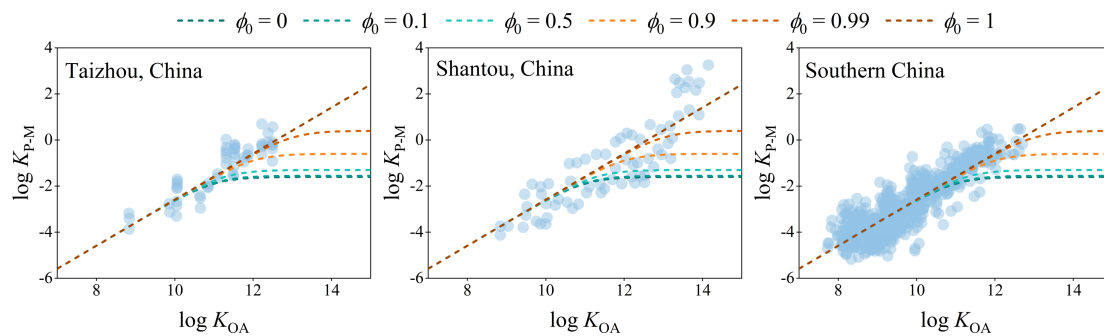

**Fig. S6. The comparison between the monitored data of  $\log K_{P-M}$  of PBDEs from E-waste sites and the prediction lines of the new steady-state model with different values of  $\phi_0$**

Note: The  $k_{deg}$  of  $0.27 \text{ h}^{-1}$  and  $f_{OM}$  of 0.21 were used in the new steady-state model; and the monitored data were cited from the following references: Taizhou, China (Han et al., 2009); Shantou, China (Chen et al., 2011); and Southern China (Tian et al., 2011).



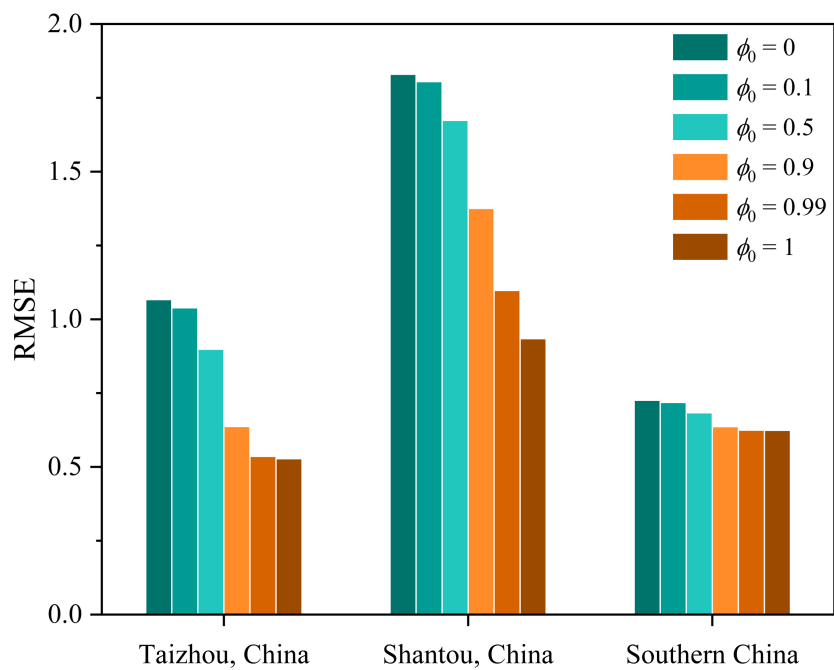

**Fig. S7. The values of the RMSE of the new steady-state model based on the monitored data of PBDEs from e-waste sites**

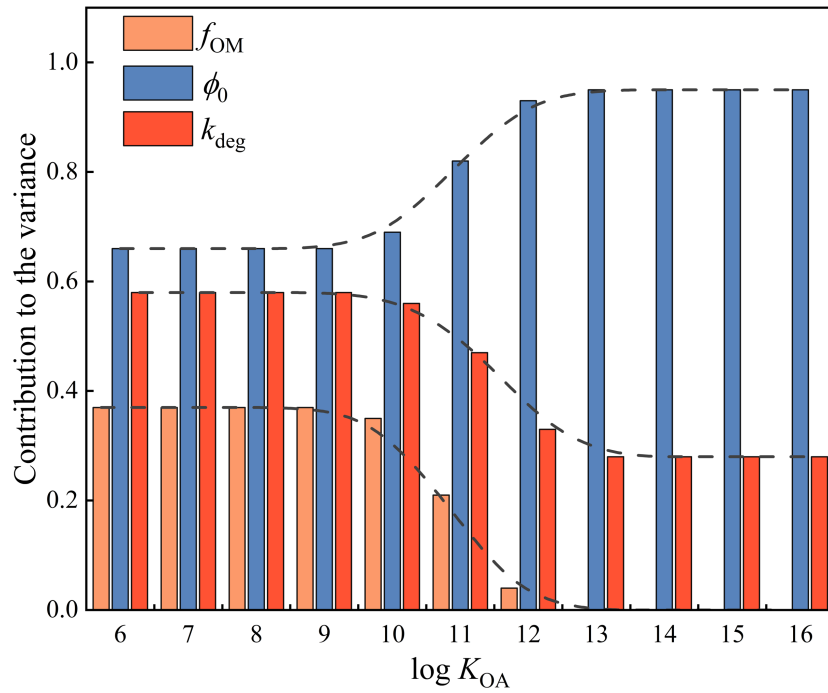

**Fig. S8. Sensitivity analysis for the parameters of  $\phi_0$ ,  $f_{OM}$ , and  $k_{deg}$  in the new steady-state model**

Note: Sensitivity analysis was conducted by the Monte Carlo analysis with 100,000 trials using the commercial software package Oracle Crystal Ball. The following variables with their distribution patterns and confidence factors (CF) were considered:  $\phi_0$ : uniform distribution, 0 to 1;  $f_{OM}$ , lognormal distribution, mean = 0.21, CF = 1.5 (Mackay, 2001);  $k_{deg}$ , lognormal distribution, mean = 0.27, CF = 3 (Wania and Dugani, 2003).

## References

- Chen, D., Bi, X., Liu, M., Huang, B., Sheng, G., and Fu, J.: Phase partitioning, concentration variation and risk assessment of polybrominated diphenyl ethers (PBDEs) in the atmosphere of an e-waste recycling site, *Chemosphere*, 82, 1246-1252, <https://doi.org/10.1016/j.chemosphere.2010.12.035>, 2011.
- Han, W., Feng, J., Gu, Z., Chen, D., Wu, M., and Fu, J.: Polybrominated Diphenyl Ethers in the Atmosphere of Taizhou, a Major E-Waste Dismantling Area in China, *Bul. Environ. Contam. Toxicol.*, 83, 783-788, <https://doi.org/10.1007/s00128-009-9855-9>, 2009.
- Harner, T. and Bidleman, T. F.: Measurement of Octanol–Air Partition Coefficients for Polycyclic Aromatic Hydrocarbons and Polychlorinated Naphthalenes, *Journal of Chemical & Engineering Data*, 43, 40-46, <http://doi.org/10.1021/jc970175x>, 1998a.
- Harner, T. and Bidleman, T. F.: Octanol-air partition coefficient for describing particle/gas partitioning of aromatic compounds in urban air, *Environ. Sci. Technol.*, 32, 1494-1502, <https://doi.org/10.1021/es970890r>, 1998b.
- Li, Y., Ma, W., and Yang, M.: Prediction of gas/particle partitioning of polybrominated diphenyl ethers (PBDEs) in global air: A theoretical study, *Atmospheric Chemistry and Physics*, 15, 1669-1681, <https://doi.org/10.5194/acp-15-1669-2015>, 2015.
- Li, Y.-F., Qin, M., Yang, P.-F., Hao, S., and Macdonald, R. W.: Particle/gas partitioning for semi-volatile organic compounds (SVOCs) in Level III multimedia fugacity models: Gaseous emissions, *Sci. Total Environ.*, 795, 148729, <https://doi.org/10.1016/j.scitotenv.2021.148729>, 2021a.
- Li, Y.-F., Qin, M., Yang, P.-F., Liu, L.-Y., Zhou, L.-J., Liu, J.-N., Shi, L.-L., Qiao, L.-N., Hu, P.-T., Tian, C.-G., Nikolaev, A., and Macdonald, R.: Treatment of particle/gas partitioning using level III fugacity models in a six-compartment system, *Chemosphere*, 271, 129580, <https://doi.org/10.1016/j.chemosphere.2021.129580>, 2021b.
- Liu, X., Zhao, D., Peng, L., Bai, H., Zhang, D., and Mu, L.: Gas–particle partition and spatial characteristics of polycyclic aromatic hydrocarbons in ambient air of a prototype coking plant, *Atmos. Environ.*, 204, 32-42, <https://doi.org/10.1016/j.atmosenv.2019.02.012>, 2019.
- Ma, Y.-G., Lei, Y. D., Xiao, H., Wania, F., and Wang, W.-H.: Critical Review and Recommended Values for the Physical-Chemical Property Data of 15 Polycyclic Aromatic Hydrocarbons at 25 degrees C, *J. Chem. Eng. Data*, 55, 819-825, <http://doi.org/10.1021/jc900477x>, 2010.
- Mackay, D.: *Multimedia Environmental Models: the Fugacity Approach*, Taylor & Francis, New York, 2001.
- Odabasi, M., Cetin, E., and Sofuoglu, A.: Determination of octanol-air partition coefficients and supercooled liquid vapor pressures of PAHs as a function of temperature: Application to gas-particle partitioning in an urban atmosphere, *Atmos. Environ.*, 40, 6615-6625, <http://doi.org/10.1016/j.atmosenv.2006.05.051>, 2006.
- Parnis, J. M., Mackay, D., and Harner, T.: Temperature dependence of Henry's law constants and K-OA for simple and heteroatom-substituted PAHs by COSMO-RS (vol 110, pg 27, 2015), *Atmos. Environ.*, 136, 21-21, <http://doi.org/10.1016/j.atmosenv.2016.04.009>, 2016.
- Qin, M., Yang, P., Hu, P., Hao, S., Macdonald, R. W., and Li, Y.: Particle/gas partitioning for semi-volatile organic compounds (SVOCs) in level III multimedia fugacity models: Both gaseous and particulate emissions, *Sci. Total Environ.*, 790, 148012, <https://doi.org/10.1016/j.scitotenv.2021.148012>, 2021.
- Tian, M., Chen, S.-J., Wang, J., Zheng, X.-B., Luo, X.-J., and Mai, B.-X.: Brominated Flame Retardants in the Atmosphere of E-Waste and Rural Sites in Southern China: Seasonal Variation, Temperature Dependence, and Gas-Particle Partitioning, *Environ. Sci. Technol.*, 45, 8819-8825, <https://doi.org/10.1021/es202284p>, 2011.
- Wania, F. and Dugani, C. B.: Assessing the long-range transport potential of polybrominated diphenyl ethers: a comparison of four multimedia models, *Environ. Toxicol. Chem.*, 22, 1252-1261, <https://doi.org/10.1002/etc.5620220610>, 2003.
